# Supplementary material for: The role of miR-106p-5p in cervical cancer: from expression to molecular mechanism
Source: PubMed Central journal article supplement (PMC6148547; doi:10.1038/s41420-018-0096-8), 2018-09-20
Supplement: 41420_2018_96_MOESM1_ESM.pdf [file 41420_2018_96_MOESM1_ESM.pdf]

Please complete the table below to indicate the contributions of all named authors to the figures.

Figure 1:

|  |
|--|
|  |
|--|

Figure 2:

|  |
|--|
|  |
|--|

Figure 3:

|  |
|--|
|  |
|--|

Figure 4:

|  |
|--|
|  |
|--|

Figure 5:

|  |
|--|
|  |
|--|

Figure 6:

|  |
|--|
|  |
|--|

Signed for and on behalf of the Author(s):

*Mei Zhang*

Print Name:

|  |
|--|
|  |
|--|

Date:

|  |
|--|
|  |
|--|
